# Supplementary material for: Tuning the Properties of Protein-Based Polymers Using High-Performance Orthogonal Translation Systems for the Incorporation of Aromatic Non-Canonical Amino Acids
Source: Front Bioeng Biotechnol. 2022 May 30;10:913057. doi: 10.3389/fbioe.2022.913057 (PMC9195583; doi:10.3389/fbioe.2022.913057)
Supplement: Supplementary file 2 [file Table1.XLSX]

## Sheet: set5_2_8_2_8_3_compset
	cross	cross.angle	para	para.angle	-2-8-	Dist(2, 8)	dip_x(μΒ)	dip_y(μL)	dip_z	μ-total	NBO C 1	NBO C 2	NBO C 3	NBO C 4	NBO C 5	NBO C 6	NBO 8	diff NBO A8-C2	B1	B5	L	loc.B5	loc.B1
acetone (13)	1675.22	16.1847	1657.67	48.1793	1822.88	1.49947	0.5021	-3.0301	-0.0017	3.07139	-0.18123	-0.16849	-0.15781	-0.21198	-0.18758	-0.21617	0.57072	0.73921	1.6	3.1	4.69	1.94	3.1
ar (4)	1643.57	24.3135	1661	26.4183	1661	1.48139	0.0001	0.0002	0.0002	0.000279734	-0.1976	-0.05054	-0.1976	-0.20448	-0.21373	-0.20447	-0.05054	0	1.7	3.14	6.76	4.12	3.18
azide (11)	1674.33	23.7609	1658.39	37.5032	1383.59	1.41968	1.0332	-0.9386	-0.6966	1.56007	-0.21952	0.10744	-0.2599	-0.1879	-0.22842	-0.19258	-0.3412	-0.44864	1.7	3.76	4.65	2.55	0
azophenyl (5)	1674.17	7.44579	1660.27	48.3553	1692.6	1.4242	0.0002	0.0004	0.0011	0.00116417	-0.18145	0.05042	-0.20105	-0.20742	-0.19585	-0.21424	-0.15594	-0.20636	1.7	4.46	8.61	5.81	3.12
azophenyl_cis (5 cis)	1652.13	7.78868	1667.63	77.3207	1709.14	1.43628	2.134	-2.3047	-0.9104	3.27026	-0.21183	0.04529	-0.2181	-0.19905	-0.21292	-0.20186	-0.10178	-0.14707	1.7	6.98	4.2	0.26	0
Tyrosine (basic)	1672.97	19.2144	1683.38	44.3768	1683.38	1.36116	0.8799	0.8377	0.5689	1.3415	-0.26747	0.29758	-0.29752	-0.18786	-0.24931	-0.18671	-0.65712	-0.9547	1.7	1.91	3.11	1.69	0
benzophenone (1)	1654.66	16.4053	1675.98	52.146	1793.8	1.49754	1.6024	1.8107	-1.8563	3.04831	-0.16022	-0.15955	-0.18358	-0.21524	-0.18957	-0.21122	0.55463	0.71418	1.84	5.63	6.62	2.11	-0.43
benzyloxy (2)	1660.56	33.287	1664.36	41.8077	1660.56	1.3588	0.4525	0.7412	-0.4532	0.97954	-0.25132	0.29465	-0.30704	-0.18649	-0.24495	-0.18932	-0.47253	-0.76718	1.73	4.14	8.76	3.9	7.16
bicyclic (3)	1678.62	30.2243	1654.95	39.4191	1426.35	1.41666	0	0.0001	-0.0001	0.000168692	-0.18005	-0.06525	-0.06536	-0.17999	-0.21151	-0.2115	-0.18002	-0.11477	1.7	4.39	4.6	-0.47	0
bromide (7)	1654.54	24.9551	1657.82	41.0641	1657.82	1.89603	1.3866	-1.1586	-0.3938	1.84935	-0.23476	-0.09219	-0.23476	-0.19624	-0.21584	-0.19624	0.05839	0.15058	1.95	1.95	4.25	1.9	3.85
chloride (9)	1659.77	23.3718	1659.97	42.6942	1659.97	1.73483	1.3306	-1.071	-0.3944	1.75302	-0.22958	-0.04715	-0.22959	-0.19616	-0.2183	-0.19616	0.00798	0.05513	1.8	1.8	3.93	1.73	3.53
iodide (6)	1649.59	25.4983	1653.23	41.064	1653.23	2.09167	1.2468	-1.0897	-0.3369	1.68987	-0.24232	-0.14902	-0.24233	-0.19757	-0.21359	-0.19757	0.13447	0.28349	2.15	2.15	4.64	2.09	4.24
methoxy (14)	1679.65	28.2743	1662.12	38.9077	1662.12	1.3571	0.3921	0.2501	-1.1822	1.27037	-0.25411	0.29379	-0.3107	-0.18782	-0.24776	-0.19066	-0.46811	-0.7619	1.7	3.03	4.48	1.76	0
methyl (15)	1681.9	24.9652	1659.49	41.4084	1659.49	1.50401	-0.2798	0.2093	0.1226	0.370362	-0.21209	-0.02464	-0.21164	-0.20306	-0.22304	-0.20332	-0.61974	-0.5951	1.52	2.02	3.4	1.89	2.89
propyneoxidane (8)	1662.42	34.2	1680.23	35.5371	1662.42	1.36111	0.7431	-0.0543	-0.8345	1.11872	-0.2493	0.28809	-0.30995	-0.1861	-0.24371	-0.18827	-0.45473	-0.74282	1.7	3.04	7.09	1.72	0
tertbutoxy (12)	1677.09	30.9994	1657.03	42.6581	1657.03	1.35662	0.0611	0.4425	-1.4509	1.51807	-0.25133	0.30118	-0.30572	-0.18782	-0.24932	-0.19109	-0.50172	-0.8029	1.35	4.06	5.74	2.78	2.71
tfm (10)	1688.18	18.3762	1669.44	45.9876	1669.44	1.50231	2.5179	-1.4228	0.0431	2.89245	-0.18185	-0.15167	-0.18497	-0.20578	-0.19366	-0.20474	0.97485	1.12652	1.97	2.6	3.76	2	3.35
